# Supplementary material
Source: publisher figshare collection journal article supplement (https://acs.figshare.com/ndownloader/files/8158535)
Supplement: Supplementary file 1 [file 8158535]

The Supplementary Materials for

**Fragment Quantum Mechanical Method for Large-sized Ion-water Clusters**

*Jinfeng Liu<sup>1</sup>, Lian-Wen Qi<sup>1\*</sup>, John Z. H. Zhang<sup>2,3,4</sup>, and Xiao He<sup>2,3\*</sup>*

*<sup>1</sup>State Key Laboratory of Natural Medicines, Department of Basic Medicine and Clinical Pharmacy, China Pharmaceutical University, Nanjing, 210009, China*

*<sup>2</sup>School of Chemistry and Molecular Engineering, East China Normal University, Shanghai, 200062, China*

*<sup>3</sup>NYU-ECNU Center for Computational Chemistry at NYU Shanghai, Shanghai, 200062, China*

*<sup>4</sup>Department of Chemistry, New York University, NY, NY 10003, US*

\* To whom correspondence should be addressed: [xiaohe@phy.ecnu.edu.cn](mailto:xiaohe@phy.ecnu.edu.cn), [qilw@cpu.edu.cn](mailto:qilw@cpu.edu.cn)

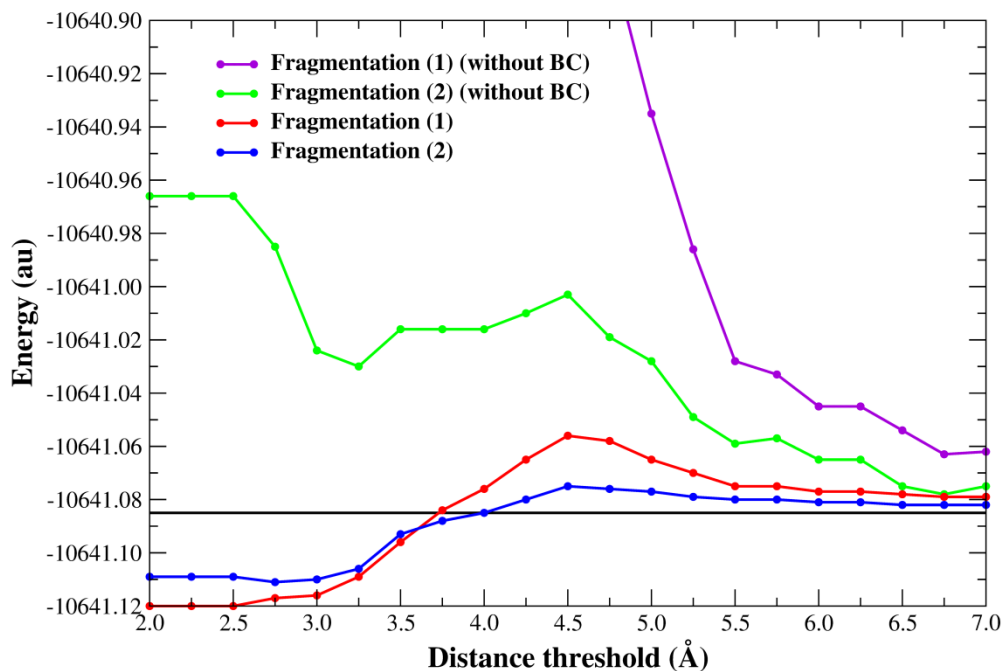

**Figure S1.** The total EE-GMF energy of the water cluster (140 water molecules) as a function of the distance threshold  $\lambda_2$  for three-body interactions. The distance threshold for two-body interactions was fixed at  $\lambda_1=7.0$  Å. “Fragmentation (1) (without BC)” sets one water molecule as a fragment without the presence of the background charges of the environment in each fragment QM calculation. “Fragmentation (2) (without BC)” uses two nearest water molecules as a fragment without the presence of the background charges of the environment in each fragment QM calculation. On the other hand, “Fragmentation (1)” and “Fragmentation (2)” utilize the electrostatic embedding scheme in each fragment QM calculation. The total energy from the full system calculation (black line) is regarded as the reference.
